# Supplementary material for: Taxonomic Richness of Yeasts in Japan within Subtropical and Cool Temperate Areas
Source: PubMed Central journal article supplement (PMC3511277; doi:10.1371/journal.pone.0050784), 2012-11-30
Supplement: pone.0050784.s002.pdf [file pone.0050784.s002.pdf]

**Table S1.1** Estimates of sequence divergence between genera in *Saccharomycetaceae*.

|                          | No. of species included | Intragenomic nucleotide changes <sup>a</sup> |                                  | Intergeneric nucleotide changes <sup>b</sup> |             |             |             |             |               |             |             |             |             |             |             |             |
|--------------------------|-------------------------|----------------------------------------------|----------------------------------|----------------------------------------------|-------------|-------------|-------------|-------------|---------------|-------------|-------------|-------------|-------------|-------------|-------------|-------------|
|                          |                         | No. of base differences                      | No. of base differences per site | <i>Kaz.</i>                                  | <i>Nak.</i> | <i>Ere.</i> | <i>Han.</i> | <i>Zyg.</i> | <i>Z'tor.</i> | <i>Sac.</i> | <i>Tet.</i> | <i>Lac.</i> | <i>Tor.</i> | <i>Nau.</i> | <i>Klu.</i> | <i>Van.</i> |
| <i>Kazachstania</i>      | 19                      | 29.44                                        | 0.064                            |                                              | 47.46       | 55.93       | 50.20       | 40.95       | 50.58         | 27.80       | 66.98       | 39.21       | 30.27       | 28.21       | 47.83       | 34.00       |
| <i>Nakaseomyces</i>      | 4                       | 44.33                                        | 0.108                            | 0.09                                         |             | 60.50       | 60.46       | 42.79       | 45.25         | 42.07       | 69.45       | 45.60       | 41.40       | 40.88       | 53.58       | 47.75       |
| <i>Eremothecium</i>      | 5                       | 17.80                                        | 0.042                            | 0.11                                         | 0.12        |             | 59.54       | 52.93       | 62.00         | 49.26       | 76.00       | 39.72       | 46.48       | 44.20       | 47.53       | 47.50       |
| <i>Hanseniaspora</i>     | 7                       | 30.76                                        | 0.076                            | 0.10                                         | 0.12        | 0.12        |             | 52.83       | 63.14         | 48.71       | 78.20       | 45.71       | 39.29       | 42.29       | 54.69       | 40.86       |
| <i>Zygosaccharomyces</i> | 6                       | 21.07                                        | 0.056                            | 0.08                                         | 0.08        | 0.10        | 0.10        |             | 46.17         | 34.83       | 68.67       | 35.83       | 35.30       | 32.75       | 47.19       | 37.25       |
| <i>Zygorulaspota</i>     | 2                       | 20.00                                        | 0.045                            | 0.10                                         | 0.09        | 0.12        | 0.12        | 0.09        |               | 46.50       | 76.10       | 45.00       | 44.90       | 40.25       | 52.42       | 50.25       |
| <i>Saccharomyces</i>     | 7                       | 12.10                                        | 0.029                            | 0.05                                         | 0.08        | 0.10        | 0.09        | 0.07        | 0.09          |             | 63.69       | 34.74       | 21.97       | 23.43       | 42.60       | 23.07       |
| <i>Tetrapispora</i>      | 5                       | 48.30                                        | 0.108                            | 0.13                                         | 0.13        | 0.15        | 0.15        | 0.13        | 0.15          | 0.12        |             | 68.04       | 62.76       | 61.30       | 71.77       | 69.20       |
| <i>Lachancea</i>         | 5                       | 16.50                                        | 0.033                            | 0.08                                         | 0.09        | 0.08        | 0.09        | 0.07        | 0.09          | 0.07        | 0.13        |             | 28.36       | 27.10       | 37.33       | 27.50       |
| <i>Torulaspota</i>       | 5                       | 5.20                                         | 0.013                            | 0.06                                         | 0.08        | 0.09        | 0.08        | 0.07        | 0.09          | 0.04        | 0.12        | 0.06        |             | 16.90       | 32.00       | 20.60       |
| <i>Naumovozyma</i>       | 2                       | 7.00                                         | 0.021                            | 0.05                                         | 0.08        | 0.09        | 0.08        | 0.06        | 0.08          | 0.05        | 0.12        | 0.05        | 0.03        |             | 35.75       | 24.75       |
| <i>Kluyveromyces</i>     | 6                       | 9.20                                         | 0.022                            | 0.09                                         | 0.10        | 0.09        | 0.11        | 0.09        | 0.10          | 0.08        | 0.14        | 0.07        | 0.06        | 0.07        |             | 45.08       |
| <i>Vanderwaltozyma</i>   | 2                       | 12.00                                        | 0.023                            | 0.07                                         | 0.09        | 0.09        | 0.08        | 0.07        | 0.10          | 0.04        | 0.13        | 0.05        | 0.04        | 0.05        | 0.09        |             |

Data were calculated based on Kurtzman [15].

<sup>a</sup> Number of base differences per sequence averaging overall sequence pairs within each group.

<sup>b</sup> Upper right, Number of base differences per sequence averaging overall sequence pairs between groups; Lower left, The p-distance averaging overall sequence pairs between groups.

All positions containing gaps and missing data were eliminated.

There were a total of 515 positions in the final dataset. Evolutionary analyses were conducted in MEGA5 [24].

**Table S1.2** Estimates of sequence divergence between genera *Derxomyces*, *Dioszegia*, *Filobasidiella* and *Hannaella* .

|                       | No. of species included | Intragenomic nucleotide changes <sup>a</sup> |                                  | Intergeneric nucleotide changes <sup>b</sup> |             |             |             |
|-----------------------|-------------------------|----------------------------------------------|----------------------------------|----------------------------------------------|-------------|-------------|-------------|
|                       |                         | No. of base differences                      | No. of base differences per site | <i>Der.</i>                                  | <i>Dio.</i> | <i>Fil.</i> | <i>Han.</i> |
| <i>Derxomyces</i>     | 11                      | 13.58                                        | 0.024                            |                                              | 49.60       | 75.59       | 46.05       |
| <i>Dioszegia</i>      | 13                      | 15.05                                        | 0.026                            | 0.09                                         |             | 90.23       | 56.76       |
| <i>Filobasidiella</i> | 4                       | 18.83                                        | 0.033                            | 0.12                                         | 0.16        |             | 68.96       |
| <i>Hannaella</i>      | 7                       | 28.57                                        | 0.050                            | 0.08                                         | 0.10        | 0.12        |             |

Data were calculated based on Fig 100.8C of "The Yeasts, A Taxonomic Study" 5th ed. [17].

<sup>a</sup> Number of base differences per sequence averaging overall sequence pairs within each group.

<sup>b</sup> Upper right, Number of base differences per sequence averaging overall sequence pairs between groups; Lower left, The p-distance averaging overall sequence pairs between groups.

All positions containing gaps and missing data were eliminated. There were a total of 583 positions in the final dataset. Evolutionary analyses were conducted in MEGA5 [24].

**Table S1.3** Estimates of sequence divergence between yeast groups in the Microbotryomycetes of the Pucciniomycotina.

|                                               | No. of species included | Intra-group nucleotide changes <sup>a</sup> |                                  |                       | Inter-group nucleotide changes <sup>b</sup> |                |             |             |             |             |                |             |             |                          |             |             |
|-----------------------------------------------|-------------------------|---------------------------------------------|----------------------------------|-----------------------|---------------------------------------------|----------------|-------------|-------------|-------------|-------------|----------------|-------------|-------------|--------------------------|-------------|-------------|
|                                               |                         | No. of base differences                     | No. of base differences per site | <i>yam. / L. ant.</i> | Leucosporidiales                            | Microbotryales | <i>van.</i> | <i>Cur.</i> | <i>Col.</i> | <i>hyl.</i> | <i>H. pyc.</i> | <i>jav.</i> | <i>Rho.</i> | mixed <i>Rho. / Spo.</i> | <i>Spo.</i> | <i>son.</i> |
| <i>yamatoana / Leucosporidium antarcticum</i> | 21                      | 32.28                                       | 0.060                            |                       | 38.71                                       | 48.13          | 34.43       | 45.43       | 47.11       | 56.62       | 55.76          | 58.90       | 60.93       | 61.01                    | 63.02       | 86.76       |
| Leucosporidiales                              | 8                       | 10.71                                       | 0.020                            | 0.07                  |                                             | 33.02          | 21.63       | 41.00       | 55.79       | 65.38       | 64.00          | 69.00       | 59.68       | 52.79                    | 71.45       | 91.75       |
| Microbotryales                                | 12                      | 21.03                                       | 0.039                            | 0.09                  | 0.06                                        |                | 37.38       | 49.71       | 58.24       | 67.92       | 65.33          | 76.33       | 60.19       | 52.95                    | 72.24       | 86.58       |
| <i>vanillica</i>                              | 2                       | 5.00                                        | 0.009                            | 0.06                  | 0.04                                        | 0.07           |             | 31.25       | 51.75       | 60.00       | 58.50          | 58.50       | 56.58       | 52.39                    | 66.32       | 87.50       |
| <i>Curvibasidium</i>                          | 4                       | 11.50                                       | 0.021                            | 0.08                  | 0.08                                        | 0.09           | 0.06        |             | 55.75       | 63.25       | 67.75          | 65.75       | 62.50       | 58.97                    | 68.93       | 85.25       |
| <i>Colacogloea</i>                            | 6                       | 30.93                                       | 0.057                            | 0.09                  | 0.10                                        | 0.11           | 0.09        | 0.10        |             | 61.67       | 64.33          | 62.50       | 66.69       | 70.61                    | 74.32       | 92.17       |
| <i>Rhodotorula hylophila</i>                  | 1                       | n/c                                         |                                  | 0.11                  | 0.13                                        | 0.14           | 0.12        | 0.13        | 0.12        |             | 58.00          | 61.00       | 66.69       | 70.89                    | 68.12       | 88.00       |
| <i>Heterogastridium pycnidioideum</i>         | 1                       | n/c                                         |                                  | 0.11                  | 0.12                                        | 0.12           | 0.11        | 0.13        | 0.12        | 0.12        |                | 68.00       | 81.38       | 84.00                    | 79.76       | 101.00      |
| <i>Rhodotorula javanica</i>                   | 1                       | n/c                                         |                                  | 0.11                  | 0.13                                        | 0.14           | 0.11        | 0.12        | 0.12        | 0.12        | 0.13           |             | 71.31       | 77.78                    | 79.94       | 102.00      |
| <i>Rhodospordium</i>                          | 13                      | 24.74                                       | 0.047                            | 0.12                  | 0.11                                        | 0.11           | 0.11        | 0.12        | 0.13        | 0.13        | 0.15           | 0.13        |             | 40.78                    | 66.71       | 90.15       |
| mixed <i>Rhodospordium / Sporidiobolus</i>    | 9                       | 19.86                                       | 0.038                            | 0.12                  | 0.10                                        | 0.10           | 0.10        | 0.11        | 0.13        | 0.14        | 0.16           | 0.15        | 0.08        |                          | 57.56       | 83.78       |
| <i>Sporidiobolus</i>                          | 17                      | 20.75                                       | 0.039                            | 0.12                  | 0.14                                        | 0.14           | 0.13        | 0.13        | 0.14        | 0.14        | 0.15           | 0.15        | 0.13        | 0.11                     |             | 83.53       |
| <i>Rhodotorula sonckii</i>                    | 1                       | n/c                                         |                                  | 0.16                  | 0.17                                        | 0.16           | 0.16        | 0.16        | 0.17        | 0.18        | 0.19           | 0.19        | 0.17        | 0.16                     | 0.16        |             |

Data were calculated based on Fig 100.7C of "The Yeasts, A Taxonomic Study" 5th ed. [17].

<sup>a</sup> Number of base differences per sequence averaging overall sequence pairs within each group.

<sup>b</sup> Upper right, Number of base differences per sequence averaging overall sequence pairs between groups; Lower left, The p-distance averaging overall sequence pairs between groups.

All positions containing gaps and missing data were eliminated. There were a total of 569 positions in the final dataset. Evolutionary analyses were conducted in MEGA5 [24].

The presence of n/c in the results denotes cases in which it was not possible to estimate evolutionary distances.
