# Supplementary material for: Taxonomic Richness of Yeasts in Japan within Subtropical and Cool Temperate Areas
Source: PubMed Central journal article supplement (PMC3511277; doi:10.1371/journal.pone.0050784), 2012-11-30
Supplement: pone.0050784.s003.pdf [file pone.0050784.s003.pdf]

**Table S2** The shared chaos between groups isolated from Iriomote Island and Rishiri Island on particular thresholds

| Distance | IP      | IS      | RP      | RS      | Shared between |           |           |           |           |           |               |               |               |               | Total   |
|----------|---------|---------|---------|---------|----------------|-----------|-----------|-----------|-----------|-----------|---------------|---------------|---------------|---------------|---------|
|          |         |         |         |         | IP and IS      | IP and RP | IP and RS | IS and RP | IS and RS | RP and RS | IP, IS and RP | IP, IS and RS | IP, RP and RS | IS, RP and RS |         |
| unique   | 187.231 | 75      | 94.0714 | 94.3333 | 39.3333        | 10.5      | 5         | 2         | 10.1667   | 5.5       | 2             | 4             | 2             | 2             | 386.136 |
| 0.005    | 153.143 | 57.3    | 62.8333 | 66      | 37             | 17.5      | 6         | 2         | 11.1667   | 7.5       | 2             | 5             | 2             | 2             | 267.109 |
| 0.030    | 102.5   | 46.2727 | 36.5    | 57.5    | 31             | 20.5      | 6         | 4         | 9.41667   | 6         | 4             | 4             | 3             | 2             | 176.856 |
| 0.100    | 43      | 24.4286 | 28      | 43.1667 | 17.5           | 19.5      | 17.75     | 7.5       | 16        | 12.75     | 7.5           | 10.5          | 10.3333       | 7.5           | 75.9286 |
